# Supplementary material for: Insights into the skin microbiome dynamics of leprosy patients during multi-drug therapy and in healthy individuals from Brazil
Source: PubMed Central journal article supplement (PMC5993821; doi:10.1038/s41598-018-27074-0), 2018-06-08
Supplement: 41598_2018_27074_MOESM1_ESM.pdf [file 41598_2018_27074_MOESM1_ESM.pdf]

## Insights into the skin microbiome dynamics of leprosy patients during multi-drug therapy and in healthy individuals from Brazil

Paulo E. S. Silva, Mariana P. Reis, Marcelo P. Ávila, Marcela F. Dias, Patrícia S. Costa, Maria L. S. Suhadolnik, Bárbara G. Kunzmann, Anderson O. Carmo, Evanguedes Kalapotakis, Edmar Chartone-Souza and Andréa M. A. Nascimento

### Supplementary Information

**Supplementary Table S1.** Summary of the dataset quality control from the healthy and leprosy skin libraries.

---

| <b>Workflow</b>                                                                                                             |            |
|-----------------------------------------------------------------------------------------------------------------------------|------------|
| Raw reads                                                                                                                   | 43,907,427 |
| Resulting reads after a quality cutoff of $\geq 30$                                                                         | 35,125,942 |
| Contigs                                                                                                                     | 23,285,870 |
| Resulting reads after removal of homopolymers, ambiguous bases and length outside the range of $\leq 252$ and $\geq 254$ bp | 13,681,657 |
| Resulting reads after aligning                                                                                              | 13,681,657 |
| Resulting reads after removal of chimera, mitochondria and chloroplast and those outside the Bacteria domain                | 10,403,990 |

---

**Supplementary Table S2.** More frequent OTUs from control and initial visit patient groups that were classified at the species level using 16S rRNA sequences from the PATRIC database.

| OTU    | Species                             | Frequency relative (%) |               |
|--------|-------------------------------------|------------------------|---------------|
|        |                                     | Control                | Initial visit |
| 000001 | <i>Micrococcus luteus</i>           | 1.1                    | 10.9          |
| 000002 | <i>Staphylococcus aureus</i>        | 24.2                   | 6.4           |
| 000003 | <i>Morganella morganii</i>          | 0.03                   | 7             |
| 000005 | <i>Streptococcus oralis</i>         | 10                     | 2.8           |
| 000008 | <i>Propionibacterium acnes</i>      | 2.3                    | 2.8           |
| 000010 | <i>Pseudomonas stutzeri</i>         | 1.8                    | 1.3           |
| 000011 | <i>Acinetobacter johnsonii</i>      | 0.8                    | 1             |
| 000012 | <i>Moraxella osloensis</i>          | 1.8                    | 2.8           |
| 000013 | <i>Brevundimonas nasdae</i>         | 0.3                    | 1.8           |
| 000014 | <i>Kocuria atrinae</i>              | 0.2                    | 1.4           |
| 000015 | <i>Paracoccus denitrificans</i>     | 2.5                    | 1.5           |
| 000020 | <i>Microbacterium paraoxydans</i>   | 0.2                    | 1             |
| 000023 | <i>Streptococcus thermophilus</i>   | 5.3                    | 1             |
| 000037 | <i>Prevotella melaninogenica</i>    | 1.6                    | 0.4           |
| 000045 | <i>Actinomyces johnsonii</i>        | 1.4                    | 0.3           |
| 000046 | <i>Fusobacterium gonidiaformans</i> | 1.1                    | 0.3           |
| 000047 | <i>Gemella sanguinis</i>            | 1.6                    | 0.3           |
| 000085 | <i>Rothia dentocariosa</i>          | 1.9                    | 0.4           |
| 000097 | <i>Haemophilus influenzae</i>       | 1.3                    | 0.3           |
| 000104 | <i>Lactobacillus crispatus</i>      | 1.4                    | 0.3           |
