# Supplementary material for: Insights into the skin microbiome dynamics of leprosy patients during multi-drug therapy and in healthy individuals from Brazil
Source: PubMed Central journal article supplement (PMC5993821; doi:10.1038/s41598-018-27074-0), 2018-06-08
Supplement: 41598_2018_27074_MOESM2_ESM.pdf [file 41598_2018_27074_MOESM2_ESM.pdf]

## Supplementary Information

### Insights into the skin microbiome dynamics of leprosy patients during multi-drug therapy and in healthy individuals from Brazil

Paulo E. S. Silva, Mariana P. Reis, Marcelo P. Ávila, Marcela F. Dias, Patrícia S. Costa, Maria L. S. Suhadolnik, Bárbara G. Kunzmann, Anderson O. Carmo, Evanguedes Kalapotakis, Edmar Chartone-Souza and Andréa M. A. Nascimento

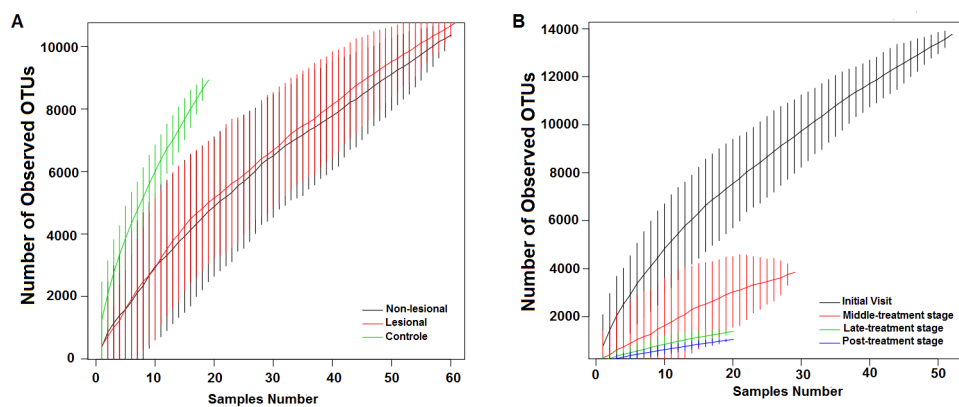

**Supplementary Figure S1.** Species-accumulation curves representing the number of OTUs (species) accumulated from the sample number for the control, and non-lesional and lesional samples (A) at the initial visit, therapy stages and post-treatment (B).
